# Supplementary material
Source: Springer Nature journal article supplement (https://www.springermedizin.de/resource/supplementary/12931_2011_1182_MOESM1_ESM.pdf/9425498)
Supplement: MOESM1 [file 9425498]

**Screened**  
n = 1324

**Randomized**  
n = 822

**NVA237**  
n = 552

**Placebo**  
n = 270

**Discontinued: 102 (18.5%)**

- Withdrew consent 38 (37.3%)
- Adverse event 30 (29.4%)
- Administrative problems 21 (20.6%)
- Unsatisfactory therapeutic effect 5 (4.9%)
- Protocol deviation 4 (3.9%)
- Death 2 (2.0%)
- Lost to follow up 1 (1.0%)
- Patient's inability to use device 1 (1.0%)

**Discontinued: 58 (21.5%)**

- Withdrew consent 14 (24.1%)
- Adverse event 16 (27.6%)
- Administrative problems 13 (22.4%)
- Unsatisfactory therapeutic effect 5 (8.6%)
- Protocol deviation 3 (5.2%)
- Death 3 (5.2%)
- Lost to follow up 2 (3.4%)
- Patient's inability to use device 1 (1.7%)
- Patient no longer requires study drug 1 (1.7%)

**Completed Week 26**  
n = 450 (81.5%)

**Completed Week 26**  
n = 212 (78.5%)
